# Supplementary material
Source: PubMed Central journal article supplement (PMC4948673)
Supplement: NIHMS68300-supplement-Supplementary_methods_checklist.pdf [file NIHMS68300-supplement-Supplementary_methods_checklist.pdf]

Corresponding Author: Camilla Bellone

Manuscript Number: NN-A53462

Manuscript Type: Article

# Main Figures: 8

# Supplementary Figures: 8

# Supplementary Tables: 0

# Supplementary Videos: 0

## Reporting Checklist for Nature Neuroscience

This checklist is used to ensure good reporting standards and to improve the reproducibility of published results. For more information, please read [Reporting Life Sciences Research](#).

Please note that in the event of publication, it is mandatory that authors include all relevant methodological and statistical information in the manuscript.

### ► Statistics reporting, by figure

- Please specify the following information for each panel reporting quantitative data, and where each item is reported (section, e.g. Results, & paragraph number).
- Each figure legend should ideally contain an exact sample size (n) for each experimental group/condition, where n is an exact number and not a range, a clear definition of how n is defined (for example x cells from x slices from x animals from x litters, collected over x days), a description of the statistical test used, the results of the tests, any descriptive statistics and clearly defined error bars if applicable.
- For any experiments using custom statistics, please indicate the test used and stats obtained for each experiment.
- Each figure legend should include a statement of how many times the experiment shown was replicated in the lab; the details of sample collection should be sufficiently clear so that the replicability of the experiment is obvious to the reader.
- For experiments reported in the text but not in the figures, please use the paragraph number instead of the figure number.

**Note:** Mean and standard deviation are not appropriate on small samples, and plotting independent data points is usually more informative. When technical replicates are reported, error and significance measures reflect the experimental variability and not the variability of the biological process; it is misleading not to state this clearly.

|                            |                   | TEST USED             |              | n                                                |                       |                                               | DESCRIPTIVE STATS (AVERAGE, VARIANCE) |             | P VALUE               |                 | DEGREES OF FREEDOM & F/t/z/R/ETC VALUE |  |
|----------------------------|-------------------|-----------------------|--------------|--------------------------------------------------|-----------------------|-----------------------------------------------|---------------------------------------|-------------|-----------------------|-----------------|----------------------------------------|--|
| FIGURE NUMBER              | WHICH TEST?       | SECTION & PARAGRAPH # | EXACT VALUE  | DEFINED?                                         | SECTION & PARAGRAPH # | REPORTED?                                     | SECTION & PARAGRAPH #                 | EXACT VALUE | SECTION & PARAGRAPH # | VALUE           | SECTION & PARAGRAPH #                  |  |
| example<br>1a              | one-way ANOVA     | Fig. legend           | 9, 9, 10, 15 | mice from at least 3 litters/group               | Methods para 8        | error bars are mean +/- SEM                   | Fig. legend                           | p = 0.044   | Fig. legend           | F(3, 36) = 2.97 | Fig. legend                            |  |
| example<br>results, para 6 | unpaired t-test   | Results para 6        | 15           | slices from 10 mice                              | Results para 6        | error bars are mean +/- SEM                   | Results para 6                        | p = 0.0006  | Results para 6        | t(28) = 2.808   | Results para 6                         |  |
| +<br>1c                    | Mann-Whitney test | Fig. 1 Legend         | 6,7          | VTA samples from 6 scrShank3 and 7 shShank3 mice | Fig. 1c Graph         | errors bars are mean +/- SEM and scatter plot | Fig. 1c Graph                         | p = 0.008   | Fig. 1c graph         | U = 3           | Fig. 1 Legend                          |  |

|                  |             | TEST USED                |                | n        |                                                                                                       |               | DESCRIPTIVE STATS<br>(AVERAGE, VARIANCE)      |               | P VALUE                  |                | DEGREES OF<br>FREEDOM &<br>F/t/z/R/ETC VALUE |               |
|------------------|-------------|--------------------------|----------------|----------|-------------------------------------------------------------------------------------------------------|---------------|-----------------------------------------------|---------------|--------------------------|----------------|----------------------------------------------|---------------|
| FIGURE<br>NUMBER | WHICH TEST? | SECTION &<br>PARAGRAPH # | EXACT<br>VALUE | DEFINED? | SECTION &<br>PARAGRAPH #                                                                              | REPORTED?     | SECTION &<br>PARAGRAPH #                      | EXACT VALUE   | SECTION &<br>PARAGRAPH # | VALUE          | SECTION &<br>PARAGRAPH #                     |               |
| +<br>-           | Fig. 1c     | Mann-Whitney test        | Fig. 1 Legend  | 4,5      | SN samples from 4 scrShank3 and 5 shShank3 mice                                                       | Fig. 1c Graph | errors bars are mean +/- SEM and scatter plot | Fig. 1c Graph | $p > 0.999$              | Fig. 1c graph  | U = 10                                       | Fig. 1 Legend |
| +<br>-           | Fig. 2a     | Kruskal-Wallis           | Fig. 2 Legend  | 9, 10, 4 | 9 Uninfected cells from 7 mice, 10 shShank3 infected cells from 9 mice, 4 scrShank3 cells from 3 mice | Fig. 2a Graph | errors bars are mean +/- SEM and scatter plot | Fig. 2a Graph | $p = 0.005$              | Fig. 2a Legend | K (2) = 10.47                                | Fig. 1 Legend |
| +<br>-           | Fig. 2a     | Dunn's test              | Fig. 2 Legend  | 9, 10    | 9 Uninfected cells from 7 mice, 10 shShank3 infected cells from 9 mice                                | Fig. 2a Graph | errors bars are mean +/- SEM and scatter plot | Fig. 2a Graph | $p = 0.013$              | Fig. 2a Graph  |                                              |               |
| +<br>-           | Fig. 2a     | Dunn's test              | Fig. 2 Legend  | 10, 4    | 10 shShank3 infected cells from 9 mice, 4 scrShank3 cells from 3 mice                                 | Fig. 2a Graph | errors bars are mean +/- SEM and scatter plot | Fig. 2a Graph | $p = 0.043$              | Fig. 2a Graph  |                                              |               |
| +<br>-           | Fig. 2b     | unpaired t-test          | Fig. 2 Legend  | 9,11     | 9 Uninfected cells from 6 mice, 11 shShank3 cells from 6 mice                                         | Fig. 2b Graph | errors bars are mean +/- SEM and scatter plot | Fig. 2b Graph | $p = 0.960$              | Fig. 2a Graph  | t (18) = 0.05                                | Fig. 2 Legend |
| +<br>-           | Fig. 2c     | One-Way ANOVA            | Fig. 2 Legend  | 12,12,6  | 12 Uninfected from 8 mice, 12 shShank3 from 10 mice, 6 scrShank3 from 3 mice                          | Fig. 2c Graph | errors bars are mean +/- SEM and scatter plot | Fig. 2c Graph | $p < 0.001$              | Fig. 2c Legend | F (2, 27) = 11.66                            | Fig. 2 Legend |
| +<br>-           | Fig. 2c     | Tukey HSD                | Fig. 2 Legend  | 12, 12   | 12 Uninfected from 8 mice, 12 shShank3 from 10 mice                                                   | Fig. 2c Graph | errors bars are mean +/- SEM and scatter plot | Fig. 2c Graph | $p < 0.001$              | Fig. 2c Graph  |                                              |               |
| +<br>-           | Fig. 2c     | Tukey HSD                | Fig. 2 Legend  | 12, 6    | 12 shShank3 from 10 mice, 6 scrShank3 from 3 mice                                                     | Fig. 2c Graph | errors bars are mean +/- SEM and scatter plot | Fig. 2c Graph | $p = 0.003$              | Fig. 2c Graph  |                                              |               |
| +<br>-           | Fig. 2e     | unpaired t-test          | Fig. 2 Legend  | 6, 6     | 6 Uninfected from 4 mice, 4 shShank3 from 4 mice                                                      | Fig. 2e Graph | errors bars are mean +/- SEM and scatter plot | Fig. 2e Graph | $p = 0.837$              | Fig. 2e Graph  | t (10) = -0.21                               | Fig. 2 Legend |
| +<br>-           | Fig. 2f     | unpaired t-test          | Fig. 2 Legend  | 14, 16   | 14 Uninfected from 10 mice, 16 shShank3 from 8 mice                                                   | Fig. 2f Graph | errors bars are mean +/- SEM and scatter plot | Fig. 2e Graph | $p = 0.872$              | Fig. 2f Graph  | t (28) = -0.16                               | Fig. 2 Legend |
| +<br>-           | Fig. 2g     | Mann-Whitney test        | Fig. 2 Legend  | 9, 6     | 9 Uninfected cells from 6 mice, 6 shShank3 from 5 mice                                                | Fig. 2g Graph | errors bars are mean +/- SEM and scatter plot | Fig. 2g Graph | $p = 0.316$              | Fig. 2g Graph  | U = 18.50                                    | Fig. 2 Legend |
| +<br>-           | Fig. 2h     | unpaired t-test          | Fig. 2 Legend  | 7, 7     | 7 Uninfected from 6 mice, 7 shShank3 from 5 mice                                                      | Fig. 2h Graph | errors bars are mean +/- SEM and scatter plot | Fig. 2h Graph | $p = 0.712$              | Fig. 2h Graph  | t (12) = 0.38                                | Fig. 2 Legend |
| +<br>-           | Fig. 3a     | unpaired t-test          | Fig. 3 Legend  | 9, 7     | 9 Uninfected from 8 mice, 7 shShank3 from 6 mice                                                      | Fig. 3a Graph | errors bars are mean +/- SEM and scatter plot | Fig. 3a Graph | $p = 0.008$              | Fig. 3a Graph  | t (14) = -3.11                               | Fig. 3 Legend |
| +<br>-           | Fig. 3b     | unpaired t-test          | Fig. 3 Legend  | 12, 15   | 12 Uninfected cells from 6 mice, 15 shShank3 from 4 mice                                              | Fig. 3b Graph | errors bars are mean +/- SEM and scatter plot | Fig. 3b Graph | $p = 0.455$              | Fig. 3b Graph  | t (25) = -0.76                               | Fig. 3 Legend |

|        |         |                     |                     |                |                                                                                                                                                    |               |                                               |               |                                                                                                 |                |                                                                                                                    |                |
|--------|---------|---------------------|---------------------|----------------|----------------------------------------------------------------------------------------------------------------------------------------------------|---------------|-----------------------------------------------|---------------|-------------------------------------------------------------------------------------------------|----------------|--------------------------------------------------------------------------------------------------------------------|----------------|
| +<br>- | Fig. 3c | unpaired t-test     | Fig. 3 Legend       | 7, 5           | 7 Uninfected cells from 5 mice, 5 shShank3 from 3 mice                                                                                             | Fig. 3c Graph | errors bars are mean +/- SEM and scatter plot | Fig. 3c Graph | p = 0.993                                                                                       | Fig. 3c Graph  | t (10) = 0.01                                                                                                      | Fig. 3 Legend  |
| +<br>- | Fig. 4b | paired t-test       | Fig. 4 Legend       | 6              | 6 shShank3 from 5 mice                                                                                                                             | Fig. 4b Graph | errors bars are mean +/- SEM and scatter plot | Fig. 4b Graph | p = 0.016                                                                                       | Fig. 4b Graph  | t (5) = 3.60                                                                                                       | Fig. 4 Legend  |
| +<br>- | Fig. 4b | paired t-test       | Fig. 4 Legend       | 5              | 5 Uninfected cells from 3 mice                                                                                                                     | Fig. 4b Graph | errors bars are mean +/- SEM and scatter plot | Fig. 4b Graph | p = 0.230                                                                                       | Fig. 4b Graph  | t (4) = 1.42                                                                                                       | Fig. 4 Legend  |
| +<br>- | Fig. 4c | Two-Way ANOVA       | Fig. 4 Legend       | 5, 8, 5, 8     | 5 scrShank3 vehicle from 4 mice, 8 shShank3 vehicle cells from 3 mice, 5 scrShank3 Ro from 5 mice, 8 shShank3 Ro from 5 mice                       | Fig. 4c Graph | errors bars are mean +/- SEM and scatter plot | Fig. 4c Graph | virus x drug interaction p = 0.019<br>virus main effect p < 0.001<br>drug main effect p = 0.015 | Fig. 4c Legend | virus x drug interaction F (1,22) = 6.41<br>virus main effect F (1,22) = 20.54<br>drug main effect F (1,22) = 7.02 | Fig. 4 Legend  |
| +<br>- | Fig. 4c | Tukey HSD           | Fig. 4 Legend       | 5, 8           | 5 scrShank3 vehicle from 4 mice, 8 shShank3 vehicle cells from 3 mice                                                                              | Fig. 4c Graph | errors bars are mean +/- SEM and scatter plot | Fig. 4c Graph | p < 0.001                                                                                       | Fig. 4c Graph  |                                                                                                                    |                |
| +<br>- | Fig. 4c | Tukey HSD           | Fig. 4 Legend       | 8, 8           | 8 shShank3 vehicle cells from 3 mice, 8 shShank3 Ro from 5 mice                                                                                    | Fig. 4c Graph | errors bars are mean +/- SEM and scatter plot | Fig. 4c Graph | p = 0.002                                                                                       | Fig. 4c Graph  |                                                                                                                    |                |
| +<br>- | Fig. 4c | Tukey HSD           | Fig. 4 Legend       | 5, 8           | 5 scrShank3 vehicle from 4 mice, 8 shShank3 Ro from 5 mice                                                                                         | Fig. 4c Graph | errors bars are mean +/- SEM and scatter plot | Fig. 4c Graph | p = 0.554                                                                                       | Fig. 4c Graph  |                                                                                                                    |                |
| +<br>- | Fig. 4d | Two-Way ANOVA       | Fig. 4 Legend       | 9, 9, 6, 10    | 9 scrShank3 vehicle cells from 5 mice, 9 shShank3 vehicle cells from 3 mice, 6 scrShank3 Ro cells from 4 mice, 10 shShank3 Ro cells from 7 mice    | Fig. 4d Graph | errors bars are mean +/- SEM and scatter plot | Fig. 4d Graph | virus x drug interaction p = 0.040<br>virus main effect p = 0.001<br>drug main effect p = 0.029 | Fig. 4d Legend | virus x drug interaction F (1,30) = 4.62<br>virus main effect F (1,30) = 14.93<br>drug main effect F (1,30) = 5.26 | Fig. 4d Legend |
| +<br>- | Fig. 4d | Tukey HSD           | Fig. 4 Legend       | 9, 9           | 9 scrShank3 vehicle cells from 5 mice, 9 shShank3 vehicle cells from 3 mice                                                                        | Fig. 4d Graph | errors bars are mean +/- SEM and scatter plot | Fig. 4d Graph | p = 0.001                                                                                       | Fig. 4d Graph  |                                                                                                                    |                |
| +<br>- | Fig. 4d | Tukey HSD           | Fig. 4 Legend       | 9, 10          | 9 shShank3 vehicle cells from 3 mice, 10 shShank3 Ro cells from 7 mice                                                                             | Fig. 4d Graph | errors bars are mean +/- SEM and scatter plot | Fig. 4d Graph | p = 0.010                                                                                       | Fig. 4d Graph  |                                                                                                                    |                |
| +<br>- | Fig. 4d | Tukey HSD           | Fig. 4 Legend       | 9, 10          | 9 scrShank3 vehicle cells from 5 mice, 10 shShank3 Ro cells from 7 mice                                                                            | Fig. 4d Graph | errors bars are mean +/- SEM and scatter plot | Fig. 4d Graph | p = 0.635                                                                                       | Fig. 4 Graph   |                                                                                                                    |                |
| +<br>- | Fig. 5d | Kruskal-Wallis Test | Fig. 5 Legend, left | 15, 15, 24, 21 | 15 scrShank3 vehicle cells from 4 mice, 15 shShank3 vehicle cells from 9 mice, 24 scrShank3 Ro cells from 6 mice, 21 shShank3 Ro cells from 4 mice | Fig. 5d Graph | errors bars are mean +/- SEM and scatter plot | Fig. 5d Graph | p = 0.003                                                                                       | Fig. 5 Legend  | K (3) = 14.09                                                                                                      | Fig. 5d Legend |

|        |         |                          |                        |                |                                                                                                                                                    |                |                                               |               |                                                                          |                |                                                                                     |                |
|--------|---------|--------------------------|------------------------|----------------|----------------------------------------------------------------------------------------------------------------------------------------------------|----------------|-----------------------------------------------|---------------|--------------------------------------------------------------------------|----------------|-------------------------------------------------------------------------------------|----------------|
| +<br>- | Fig. 5d | Dunn's test              | Fig. 5 Legend          | 15,15          | 15 scrShank3 vehicle cells from 4 mice, 15 shShank3 vehicle cells from 9 mice                                                                      | Fig. 5d, Graph | errors bars are mean +/- SEM and scatter plot | Fig. 5d Graph | p = 0.035                                                                | Fig. 5d Graph  |                                                                                     |                |
| +<br>- | Fig. 5d | Dunn's test              | Fig.5 Legend           | 24,21          | 24 scrShank3 Ro cells from 6 mice, 21 shShank3 Ro cells from 4 mice                                                                                | Fig. 5d, Graph | errors bars are mean +/- SEM and scatter plot | Fig. 5c Graph | p = 0.208                                                                | Fig. 5d Graph  |                                                                                     |                |
| +<br>- | Fig. 5d | Kruskal-Wallis test      | Fig. 5d, right, Legend | 15, 15, 24, 21 | 15 scrShank3 vehicle cells from 4 mice, 15 shShank3 vehicle cells from 9 mice, 24 scrShank3 Ro cells from 6 mice, 21 shShank3 Ro cells from 4 mice | Fig. 5d Graph  | errors bars are mean +/- SEM and scatter plot | Fig. 5d Graph | p = 0.002                                                                | Fig. 5d Legend | K (3) = 14.62                                                                       | Fig. 5d Legend |
| +<br>- | Fig. 5d | Dunn's test              | Fig. 5d, Legend        | 15, 15         | 15 scrShank3 vehicle cells from 4 mice, 15 shShank3 vehicle cells from 9 mice                                                                      | Fig. 5d Graph  | errors bars are mean +/- SEM and scatter plot | Fig. 5d Graph | p = 0.035                                                                | Fig.5d Graph   |                                                                                     |                |
| +<br>- | Fig. 5d | Dunn's test              | Fig. 5d Legend         | 24, 21         | 24 scrShank3 Ro cells from 6 mice, 21 shShank3 Ro cells from 4 mice                                                                                | Fig. 5d Graph  | errors bars are mean +/- SEM and scatter plot | Fig. 5d Graph | p = 0.251                                                                | Fig. 5d Graph  |                                                                                     |                |
| +<br>- | Fig. 5c | Kruskal-Wallis test      | Fig. 5c Legend         | 15, 15, 24, 21 | 15 scrShank3 vehicle cells from 4 mice, 15 shShank3 vehicle cells from 9 mice, 24 scrShank3 Ro cells from 6 mice, 21 shShank3 Ro cells from 4 mice | Fig. 5c Graph  | errors bars are mean +/- SEM and scatter plot | Fig. 5c Graph | p = 0.013                                                                | Fig. 5c Legend | K (3) = 10.85                                                                       | Fig. 5c Legend |
| +<br>- | Fig. 5c | Dunn's test              | Fig. 5c Legend         | 15,15          | 15 scrShank3 vehicle cells from 4 mice, 15 shShank3 vehicle cells from 9 mice                                                                      | Fig. 5c Graph  | errors bars are mean +/- SEM and scatter plot | Fig. 5c Graph | p = 0.151                                                                | Fig. 5c Graph  |                                                                                     |                |
| +<br>- | Fig. 5c | Dunn's test              | Fig. 5c Legend         | 24, 21         | 24 scrShank3 Ro cells from 6 mice, 21 shShank3 Ro cells from 4 mice                                                                                | Fig. 5c Graph  | errors bars are mean +/- SEM and scatter plot | Fig. 5c Graph | p = 0.908                                                                | Fig. 5c Graph  |                                                                                     |                |
| +<br>- | Fig. 5f | Mann-Whitney test        | Fig. 5f Legend         | 34, 35         | 34 scrShank3 vehicle cells from 8 mice, 35 shShank3 vehicle cells from 7 mice                                                                      | Fig. 5f Graph  | errors bars are mean +/- SEM and scatter plot | Fig. 5f Graph | p = 0.043                                                                | Fig. 5f Graph  | U = 425.5                                                                           | Fig. 5f Legend |
| +<br>- | Fig. 6c | RM Two-Way ANOVA         | Fig. 6c Legend         | 16, 13, 13, 16 | 16 scrShank3 vehicle mice, 13 shShank3 vehicle mice, 13 scrShank3 Ro mice, 16 shShank3 Ro mice                                                     | Fig. 6c Graph  | errors bars are mean +/- SEM and scatter plot | Fig. 6c Graph | time x virus x drug interaction p = 0.039<br>virus main effect p = 0.030 | Fig. 6c Legend | time x virus x drug interaction F(1,54) = 4.48<br>virus main effect F (1,54) = 4.99 | Fig. 6c Legend |
| +<br>- | Fig. 6c | RM ANOVA within subjects | Fig. 6c Legend         | 16             | 16 scrShank3 vehicle mice                                                                                                                          | Fig. 6c Graph  | errors bars are mean +/- SEM and scatter plot | Fig. 6c Graph | time main effect p = 0.261                                               | Fig. 6c Graph  | F (1,15) = 1.36                                                                     | Fig. 6c Legend |
| +<br>- | Fig. 6c | RM ANOVA within subjects | Fig. 6c Legend         | 13             | 13 shShank3 vehicle mice                                                                                                                           | Fig. 6c Graph  | errors bars are mean +/- SEM and scatter plot | Fig. 6c Graph | time main effect p = 0.016                                               | Fig. 6c Graph  | F (1,12) = 7.87                                                                     | Fig. 6c Legend |
| +<br>- | Fig. 6c | RM ANOVA within subjects | Fig. 6c Legend         | 13             | 13 scrShank3 Ro mice                                                                                                                               | Fig. 6c Graph  | errors bars are mean +/- SEM and scatter plot | Fig. 6c Graph | time main effect p = 0.623                                               | Fig. 6c Graph  | F (1,12) = 0.26                                                                     | Fig. 6c Legend |

|        |         |                          |                |                |                                                                                                |               |                                               |               |                                                                                                                  |                |                                                                                                                                  |                |
|--------|---------|--------------------------|----------------|----------------|------------------------------------------------------------------------------------------------|---------------|-----------------------------------------------|---------------|------------------------------------------------------------------------------------------------------------------|----------------|----------------------------------------------------------------------------------------------------------------------------------|----------------|
| +<br>- | Fig. 6c | RM ANOVA within subjects | Fig. 6c Legend | 16             | 16 shShank3 Ro mice                                                                            | Fig. 6c Graph | errors bars are mean +/- SEM and scatter plot | Fig. 6c Graph | time main effect<br>p = 0.877                                                                                    | Fig. 6c Graph  | F (1,15) = 0.03                                                                                                                  | Fig. 6c Legend |
| +<br>- | Fig. 6f | Two-Way ANOVA            | Fig. 6f Legend | 16, 13, 13, 16 | 16 scrShank3 vehicle mice, 13 shShank3 vehicle mice, 13 scrShank3 Ro mice, 16 shShank3 Ro mice | Fig. 6f Graph | errors bars are mean +/- SEM and scatter plot | Fig. 6f Graph | virus x drug interaction<br>p = 0.012<br><br>virus main effect<br>p = 0.442<br><br>drug main effect<br>p = 0.182 | Fig. 6f Legend | virus x drug interaction<br>F(1,54) = 6.76<br><br>virus main effect<br>F(1,54) = 0.60<br><br>drug main effect<br>F (1,54) = 1.83 | Fig. 6f Legend |
| +<br>- | Fig. 6f | Tukey HSD                | Fig. 6f Legend | 16, 13         | 16 scrShank3 vehicle mice, 13 shShank3 vehicle mice                                            | Fig. 6f Graph | errors bars are mean +/- SEM and scatter plot | Fig. 6f Graph | p = 0.070                                                                                                        | Fig. 6f Graph  |                                                                                                                                  |                |
| +<br>- | Fig. 6f | Tukey HSD                | Fig. 6f Legend | 13, 16         | 13 shShank3 vehicle mice, 16 shShank3 Ro mice                                                  | Fig. 6f Graph | errors bars are mean +/- SEM and scatter plot | Fig. 6f Graph | p = 0.029                                                                                                        | Fig. 6f Graph  |                                                                                                                                  |                |
| +<br>- | Fig. 6f | Tukey HSD                | Fig. 6f Legend | 16, 16         | 16 scrShank3 vehicle mice, 16 shShank3 Ro mice                                                 | Fig. 6f Graph | errors bars are mean +/- SEM and scatter plot | Fig. 6f Graph | p = 0.912                                                                                                        | Fig. 6f Graph  |                                                                                                                                  |                |
| +<br>- | Fig. 6e | Two-Way ANOVA            | Fig. 6e Legend | 16, 13, 13, 16 | 16 scrShank3 vehicle mice, 13 shShank3 vehicle mice, 13 scrShank3 Ro mice, 16 shShank3 Ro mice | Fig. 6e Graph | errors bars are mean +/- SEM and scatter plot | Fig. 6e Graph | virus x drug interaction<br>p = 0.305<br><br>virus main effect<br>p = 0.055<br><br>drug main effect<br>p = 0.606 | Fig. 6e Legend | virus x drug interaction<br>F(1,54) = 1.07<br><br>virus main effect<br>F(1,54) = 3.84<br><br>drug main effect<br>F (1,54) = 0.27 | Fig. 6e Legend |
| +<br>- | Fig. 6e | Tukey HSD                | Fig. 6e Legend | 16, 13         | 16 scrShank3 vehicle mice, 13 shShank3 vehicle mice                                            | Fig. 6e Graph | errors bars are mean +/- SEM and scatter plot | Fig. 6e Graph | p = 0.040                                                                                                        | Fig. 6e Graph  |                                                                                                                                  |                |
| +<br>- | Fig. 6e | Tukey HSD                | Fig. 6e Legend | 13, 16         | 13 shShank3 vehicle mice, 16 shShank3 Ro mice                                                  | Fig. 6e Graph | errors bars are mean +/- SEM and scatter plot | Fig. 6e Graph | p = 0.397                                                                                                        | Fig. 6e Graph  |                                                                                                                                  |                |
| +<br>- | Fig. 6e | Tukey HSD                | Fig. 6e Legend | 16, 16         | 16 scrShank3 vehicle mice, 16 shShank3 Ro mice                                                 | Fig. 6e Graph | errors bars are mean +/- SEM and scatter plot | Fig. 6e Graph | p = 0.411                                                                                                        | Fig. 6e Graph  |                                                                                                                                  |                |
| +<br>- | Fig. 6d | Two-Way ANOVA            | Fig. 6d Legend | 16, 13, 13, 16 | 16 scrShank3 vehicle mice, 13 shShank3 vehicle mice, 13 scrShank3 Ro mice, 16 shShank3 Ro mice | Fig. 6d Graph | errors bars are mean +/- SEM and scatter plot | Fig. 6d Graph | virus x drug interaction<br>p = 0.018<br><br>virus main effect<br>p = 0.194<br><br>drug main effect<br>p = 0.875 | Fig. 6d Legend | virus x drug interaction<br>F(1,54) = 5.98<br><br>virus main effect<br>F(1,54) = 1.73<br><br>drug main effect<br>F (1,54) = 0.03 | Fig. 6d Legend |
| +<br>- | Fig. 6d | Tukey HSD                | Fig. 6d Legend | 16, 13         | 16 scrShank3 vehicle mice, 13 shShank3 vehicle mice                                            | Fig. 6d Graph | errors bars are mean +/- SEM and scatter plot | Fig. 6d Graph | p = 0.028                                                                                                        | Fig. 6d Graph  |                                                                                                                                  |                |
| +<br>- | Fig. 6d | Tukey HSD                | Fig. 6d Legend | 13, 16         | 13 shShank3 vehicle mice, 16 shShank3 Ro mice                                                  | Fig. 6d Graph | errors bars are mean +/- SEM and scatter plot | Fig. 6d Graph | p = 0.166                                                                                                        | Fig. 6d Graph  |                                                                                                                                  |                |
| +<br>- | Fig. 6d | Tukey HSD                | Fig. 6d Legend | 16, 16         | 16 scrShank3 vehicle mice, 16 shShank3 Ro mice                                                 | Fig. 6d Graph | errors bars are mean +/- SEM and scatter plot | Fig. 6d Graph | p = 0.664                                                                                                        | Fig. 6d Graph  |                                                                                                                                  |                |

|        |         |                          |                |              |                                                                                      |               |                                               |               |                                                                                                                                                |                |                                                                                                                                                                         |                |
|--------|---------|--------------------------|----------------|--------------|--------------------------------------------------------------------------------------|---------------|-----------------------------------------------|---------------|------------------------------------------------------------------------------------------------------------------------------------------------|----------------|-------------------------------------------------------------------------------------------------------------------------------------------------------------------------|----------------|
| +<br>- | Fig. 7b | unpaired t-test          | Fig. 7b Legend | 8, 10        | 8 shShank3 vehicle cells from 4 mice, 10 shShank3 Ro cells from 5 mice               | Fig. 7b Graph | errors bars are mean +/- SEM and scatter plot | Fig. 7b Graph | p = 0.049                                                                                                                                      | Fig. 7b Graph  | t (8,33) = 2.30                                                                                                                                                         | Fig. 7b Legend |
| +<br>- | Fig. 7c | RM ANOVA                 | Fig. 7c Legend | 10, 14       | 10 shShank3 vehicle mice, 14 shShank3 Ro mice                                        | Fig. 7c Graph | errors bars are mean +/- SEM and scatter plot | Fig. 7c Graph | time x group interaction p = 0.028<br>group main effect p = 0.644                                                                              | Fig. 7c Graph  | time x group interaction F (1,22) = 5.56<br>group main effect F(1,22) = 0.22                                                                                            | Fig. 7c Legend |
| +<br>- | Fig. 7c | RM ANOVA within subjects | Fig.7c         | 10           | 10 shShank3 vehicle mice                                                             | Fig. 7c Graph | errors bars are mean +/- SEM and scatter plot | Fig. 7c Graph | time main effect p = 0.017                                                                                                                     | Fig. 7c Graph  | time main effect F(1,9) = 8.58                                                                                                                                          | Fig. 7c Legend |
| +<br>- | Fig. 7c | RM ANOVA within subjects | Fig.7c         | 14           | 14 shShank3 Ro mice                                                                  | Fig. 7c Graph | errors bars are mean +/- SEM and scatter plot | Fig. 7c Graph | time main effect p = 0.634                                                                                                                     | Fig. 7c Graph  | time main effect F(1,13) = 0.24                                                                                                                                         | Fig. 7c Legend |
| +<br>- | Fig. 7d | unpaired t-test          | Fig.7d         | 10, 14       | 10 shShank3 vehicle mice, 14 shShank3 Ro mice                                        | Fig. 7d Graph | errors bars are mean +/- SEM and scatter plot | Fig. 7d Graph | p = 0.009                                                                                                                                      | Fig. 7d Graph  | t (22) = -2.88                                                                                                                                                          | Fig. 7d Graph  |
| +<br>- | Fig. 7d | Mann-Whitney test        | Fig.7d Legend  | 10, 14       | 10 shShank3 vehicle mice, 14 shShank3 Ro mice                                        | Fig. 7d Graph | errors bars are mean +/- SEM and scatter plot | Fig. 7d Graph | p = 0.069                                                                                                                                      | Fig. 7d Graph  | U = 39                                                                                                                                                                  | Fig. 7d Graph  |
| +<br>- | Fig. 7d | unpaired t-test          | Fig.7d Legend  | 10, 14       | 10 shShank3 vehicle mice, 14 shShank3 Ro mice                                        | Fig. 7d Graph | errors bars are mean +/- SEM and scatter plot | Fig. 7d Graph | p = 0.023                                                                                                                                      | Fig. 7d Graph  | t (22) = -2.44                                                                                                                                                          | Fig. 7d Graph  |
| +<br>- | Fig. 8f | RM Two-Way ANOVA         | Fig. 8f Legend | 10, 11, 8, 6 | 10 scrShank3 off mice, 11 shShank3 off mice, 8 scrShank3 on mice, 6 shShank3 on mice | Fig. 8f Graph | errors bars are mean +/- SEM and scatter plot | Fig. 8f Graph | time x drug x virus interaction p = 0.300<br>light x virus interaction p = 0.025<br>virus main effect p = 0.141<br>light main effect p = 0.001 | Fig. 8f Legend | time x drug x virus interaction F (1,31) = 1.11<br>light x virus interaction F (1,31) = 5.52<br>virus main effect F (1,31) = 2.28<br>light main effect F (1,31) = 14.17 | Fig. 8f Legend |
| +<br>- | Fig. 8f | RM ANOVA within subjects | Fig. 8f        | 10           | 10 scrShank3 off                                                                     | Fig. 8f Graph | errors bars are mean +/- SEM and scatter plot | Fig. 8f Graph | time main effect p = 0.640                                                                                                                     | Fig. 8f Graph  | time main effect F(1,9) = 0.23                                                                                                                                          | Fig. 8f Legend |
| +<br>- | Fig. 8f | RM ANOVA within subjects | Fig. 8f        | 11           | 11 shShank3 off                                                                      | Fig. 8f Graph | errors bars are mean +/- SEM and scatter plot | Fig. 8f Graph | time main effect p = 0.006                                                                                                                     | Fig. 8f Graph  | time main effect F(1,10) = 11.77                                                                                                                                        | Fig. 8f Legend |
| +<br>- | Fig. 8f | RM ANOVA within subjects | Fig. 8f        | 8            | 8 scrShank3 on                                                                       | Fig. 8f Graph | errors bars are mean +/- SEM and scatter plot | Fig. 8f Graph | time main effect p < 0.001                                                                                                                     | Fig. 8f Graph  | time main effect F(1,7) = 55.14                                                                                                                                         | Fig. 8f Legend |
| +<br>- | Fig. 8f | RM ANOVA within subjects | Fig. 8f        | 6            | 6 shShank3 on mice                                                                   | Fig. 8f Graph | errors bars are mean +/- SEM and scatter plot | Fig. 8f Graph | time main effect p = 0.030                                                                                                                     | Fig. 8f Graph  | time main effect F(1,5) = 9.03                                                                                                                                          | Fig. 8f Legend |
| +<br>- | Fig. 8g | Two-Way ANOVA            | Fig. 8g Legend | 10, 11, 8, 6 | 10 scrShank3 off mice, 11 shShank3 off mice, 8 scrShank3 on mice, 6 shShank3 on mice | Fig. 8g Graph | errors bars are mean +/- SEM and scatter plot | Fig. 8g Graph | virus x light interaction p = 0.267<br>virus main effect p = 0.038<br>light main effect p < 0.001                                              | Fig. 8g Legend | virus x light interaction F(1,31) = 1.28<br>virus main effect F(1,31) = 4.70<br>light main effect F(1,31) = 16.93                                                       | Fig. 8g Legend |
| +<br>- | Fig. 8g | Dunnett test             | Fig. 8g Legend | 10,11        | 10 scrShank3 off mice, 11 shShank3 off mice                                          | Fig. 8g Graph | errors bars are mean +/- SEM and scatter plot | Fig. 8g Graph | p = 0.047                                                                                                                                      | Fig. 8g Graph  |                                                                                                                                                                         |                |

|        |                 |                   |                  |                |                                                                                                |                 |                                               |                 |                                                                                                 |                                                          |                                                                                                            |                           |
|--------|-----------------|-------------------|------------------|----------------|------------------------------------------------------------------------------------------------|-----------------|-----------------------------------------------|-----------------|-------------------------------------------------------------------------------------------------|----------------------------------------------------------|------------------------------------------------------------------------------------------------------------|---------------------------|
| +<br>- | Fig. 8g         | Dunnett test      | Fig. 8g Legend   | 10, 6          | 10 scrShank3 off mice, 6 shShank3 on mice                                                      | Fig. 8g Graph   | errors bars are mean +/- SEM and scatter plot | Fig. 8g Graph   | p = 0.405                                                                                       | Fig. 8g Graph                                            |                                                                                                            |                           |
| +<br>- | Fig. 4c         | Tukey HSD         | Fig. 4c Legend   | 5, 5           | 5 scrShank3 vehicle from 4 mice, 5 scrShank3 Ro from 5 mice                                    | Fig. 4c Graph   | errors bars are mean +/- SEM and scatter plot | Fig. 4c Graph   | p > 0.999                                                                                       | Fig. 4c Graph                                            |                                                                                                            |                           |
| +<br>- | Fig. 4c         | Tukey HSD         | Fig. 4d Legend   | 9,6            | 9 scrShank3 Vehicle from 5 mice, 6 scrShank3 Ro from 4 mice                                    | Fig. 4d         | errors bars are mean +/- SEM and scatter plot | Fig. 4d Graph   | p > 0.999                                                                                       | Fig. 4d Graph                                            |                                                                                                            |                           |
| +<br>- | Fig. S1c        | Mann-Whitney      | Fig. S1c Legend  | 5,5            | 5 infected side from 5 shShank3 mice, 5 uninfected side from 5 shShank3 mice                   | Fig. S1c Graph  | errors bars are mean +/- SEM and scatter plot | Fig. S1c Graph  | p = 0.667                                                                                       | Fig. S1c Graph                                           | U = 10.00                                                                                                  | Fig. S1c Legend           |
| +<br>- | Fig. S2a, left  | Mann-Whitney      | Fig. S2a, Legend | 14, 12         | 14 putative DA from 9 mice, 12 putative GABA from 11 mice                                      | Fig. S2a, Graph | errors bars are mean +/- SEM and scatter plot | Fig. S2a, Graph | p < 0.001                                                                                       | Fig. S2a, Graph                                          | U < 0.001                                                                                                  | Fig. S2, Legend           |
| +<br>- | Fig. S2a, right | Mann-Whitney      | Fig. S2a, Legend | 14, 12         | 14 putative DA from 9 mice, 12 putative GABA from 11 mice                                      | Fig. S2a, Graph | errors bars are mean +/- SEM and scatter plot | Fig. S2a, Graph | p < 0.001                                                                                       | Fig. S2a, Graph                                          | U = 13.00                                                                                                  | Fig. S2, Legend           |
| +<br>- | Fig. S2b, left  | Mann-Whitney      | Fig. S2b, Legend | 14, 11         | 14 putative DA from 11 mice, 11 putative GABA from 8 mice                                      | Fig. S2b Graph  | errors bars are mean +/- SEM and scatter plot | Fig. S2b Graph  | p < 0.001                                                                                       | Fig. S2b Graph                                           | U < 0.001                                                                                                  | Fig. S2b Legend           |
| +<br>- | Fig. S2b, right | Mann-Whitney      | Fig. S2b, Legend | 14, 11         | 14 putative DA from 11 mice, 11 putative GABA from 8 mice                                      | Fig. S2b Graph  | errors bars are mean +/- SEM and scatter plot | Fig. S2b Graph  | p < 0.001                                                                                       | Fig. S2b Graph                                           | U = 10.00                                                                                                  | Fig. S2b Legend           |
| +<br>- | Fig. S3b        | unpaired t-test   | Fig. S3b, Legend | 10, 10         | 10 shShank3 cells from 5 vehicle treated mice, 10 shShank3 cells from 4 Ro treated mice        | Fig. S3b Graph  | errors bars are mean +/- SEM and scatter plot | Fig. S3b Graph  | p = 0.903                                                                                       | Fig. S3b Graph                                           | t (18) = 0.123                                                                                             | Fig. S3b, Legend          |
| +<br>- | Fig. S4b        | Mann-Whitney test | Fig. S4b Legend  | 4, 4           | 4 scrShank3 vehicle mice, 4 shShank3 vehicle mice                                              | Fig. S4b Graph  | errors bars are mean +/- SEM and scatter plot | Fig. S4b Graph  | p = 0.882                                                                                       | Fig. S4b Graph                                           | U = 8.00                                                                                                   | Fig. S4b Legend           |
| +<br>- | Fig. S5a        | Two-Way ANOVA     | Fig. S5a Legend  | 16, 13, 13, 16 | 16 scrShank3 vehicle mice, 13 shShank3 vehicle mice, 13 scrShank3 Ro mice, 16 shShank3 Ro mice | Fig. S5a Graph  | errors bars are mean +/- SEM and scatter plot | Fig. S5a Graph  | virus x drug interaction p = 0.428<br>virus main effect p = 0.909<br>drug main effect p = 0.312 | exact values not reported since significance not reached | virus x drug interaction F(1,54)=0.64<br>virus main effect F(1,54)=0.02<br>drug main effect F(1,54)=1.04   | exact values not reported |
| +<br>- | Fig. S5b        | Two-Way ANOVA     | Fig. S5b Legend  | 16, 13, 13, 16 | 16 scrShank3 vehicle mice, 13 shShank3 vehicle mice, 13 scrShank3 Ro mice, 16 shShank3 Ro mice | Fig. S5b Graph  | errors bars are mean +/- SEM and scatter plot | Fig. S5b Graph  | virus x drug interaction p = 0.030<br>virus main effect p = 0.655<br>drug main effect p = 0.763 | Fig. S5b Legend                                          | virus x drug interaction F(1,54)= 4.96<br>virus main effect F(1,54)= 0.20<br>drug main effect F(1,54)=0.09 | Fig. S5b Legend           |
| +<br>- | Fig. S5b        | Tukey HSD         | Fig. S5b Legend  | 16, 13         | 16 scrShank3 vehicle mice, 13 shShank3 Vehicle mice                                            | Fig. S5b Graph  | errors bars are mean +/- SEM and scatter plot | Fig. S5b Graph  | p = 0.450                                                                                       | Fig. S5b Graph                                           |                                                                                                            |                           |

|   |   |          |               |                 |                |                                                                                                |                |                                               |                |                                                                                                 |                 |                                                                                                            |                 |
|---|---|----------|---------------|-----------------|----------------|------------------------------------------------------------------------------------------------|----------------|-----------------------------------------------|----------------|-------------------------------------------------------------------------------------------------|-----------------|------------------------------------------------------------------------------------------------------------|-----------------|
| + | - | Fig. S5b | Tukey HSD     | Fig. S5b Legend | 13, 16         | 13 shShank3 vehicle, 16 shShank3 Ro mice                                                       | Fig. S5b Graph | errors bars are mean +/- SEM and scatter plot | Fig. S5b Graph | p = 0.205                                                                                       | Fig. S5b Graph  |                                                                                                            |                 |
| + | - | Fig. S5b | Tukey HSD     | Fig. S5b Legend | 16, 16         | 16 scrShank3 vehicle mice, 16 shShank3 Ro mice                                                 | Fig. S5b Graph | errors bars are mean +/- SEM and scatter plot | Fig. S5b Graph | p = 0.850                                                                                       | Fig. S5b Graph  |                                                                                                            |                 |
| + | - | Fig. S5c | Two-Way ANOVA | Fig. S5c Legend | 16, 13, 13, 16 | 16 scrShank3 vehicle mice, 13 shShank3 vehicle mice, 13 scrShank3 Ro mice, 16 shShank3 Ro mice | Fig. S5c Graph | errors bars are mean +/- SEM and scatter plot | Fig. S5c Graph | virus x drug interaction p = 0.192<br>virus main effect p = 0.020<br>drug main effect p = 0.931 | Fig. S5c Legend | virus x drug interaction F(1,54)= 1.74<br>virus main effect F(1,54)= 5.76<br>drug main effect F(1,54)=0.01 | Fig. S5c Legend |
| + | - | Fig. S5c | Tukey HSD     | Fig. S5c Legend | 16, 13         | 16 scrShank3 vehicle mice, 13 shShank3 Vehicle mice                                            | Fig. S5c Graph | errors bars are mean +/- SEM and scatter plot | Fig. S5c Graph | p = 0.041                                                                                       | Fig. S5c Graph  |                                                                                                            |                 |
| + | - | Fig. S5c | Tukey HSD     | Fig. S5c Legend | 13, 16         | 13 shShank3 vehicle, 16 shShank3 Ro mice                                                       | Fig. S5c Graph | errors bars are mean +/- SEM and scatter plot | Fig. S5c Graph | p = 0.610                                                                                       | Fig. S5c Graph  |                                                                                                            |                 |
| + | - | Fig. S5c | Tukey HSD     | Fig. S5c Legend | 16, 16         | 16 scrShank3 vehicle mice, 16 shShank3 Ro mice                                                 | Fig. S5c Graph | errors bars are mean +/- SEM and scatter plot | Fig. S5c Graph | p = 0.234                                                                                       | Fig. S5c Graph  |                                                                                                            |                 |
| + | - | Fig. S5d | Two-Way ANOVA | Fig. S5d Legend | 16, 13, 13, 16 | 16 scrShank3 vehicle mice, 13 shShank3 vehicle mice, 13 scrShank3 Ro mice, 16 shShank3 Ro mice | Fig. S5d Graph | errors bars are mean +/- SEM and scatter plot | Fig. S5d Graph | virus x drug interaction p = 0.416<br>virus main effect p = 0.042<br>drug main effect p = 0.406 | Fig. S5d Legend | virus x drug interaction F(1,54)= 0.67<br>virus main effect F(1,54)= 4.33<br>drug main effect F(1,54)=0.45 | Fig. S5d Legend |
| + | - | Fig. S5d | Tukey HSD     | Fig. S5d Legend | 16, 13         | 16 scrShank3 vehicle mice, 13 shShank3 Vehicle mice                                            | Fig. S5d Graph | errors bars are mean +/- SEM and scatter plot | Fig. S5d Graph | p = 0.114                                                                                       | Fig. S5d Graph  |                                                                                                            |                 |
| + | - | Fig. S5d | Tukey HSD     | Fig. S5d Legend | 13, 16         | 13 shShank3 vehicle, 16 shShank3 Ro mice                                                       | Fig. S5d Graph | errors bars are mean +/- SEM and scatter plot | Fig. S5d Graph | p = 0.994                                                                                       | Fig. S5d Graph  |                                                                                                            |                 |
| + | - | Fig. S5d | Tukey HSD     | Fig. S5d Legend | 16, 16         | 16 scrShank3 vehicle mice, 16 shShank3 Ro mice                                                 | Fig. S5d Graph | errors bars are mean +/- SEM and scatter plot | Fig. S5d Graph | p = 0.113                                                                                       | Fig. S5d Graph  |                                                                                                            |                 |
| + | - | Fig. S5e | Two-Way ANOVA | Fig. S5e Legend | 16, 13, 13, 16 | 16 scrShank3 vehicle mice, 13 shShank3 vehicle mice, 13 scrShank3 Ro mice, 16 shShank3 Ro mice | Fig. S5e Graph | errors bars are mean +/- SEM and scatter plot | Fig. S5e Graph | virus x drug interaction p = 0.016<br>virus main effect p = 0.703<br>drug main effect p = 0.010 | Fig. S5e Legend | virus x drug interaction F(1,54)= 3.68<br>virus main effect F(1,54)= 0.15<br>drug main effect F(1,54)=7.15 | Fig. S5e Legend |
| + | - | Fig. S5e | Tukey HSD     | Fig. S5e Legend | 16, 13         | 16 scrShank3 vehicle mice, 13 shShank3 Vehicle mice                                            | Fig. S5e Graph | errors bars are mean +/- SEM and scatter plot | Fig. S5e Graph | p = 0.538                                                                                       | Fig. S5e Graph  |                                                                                                            |                 |
| + | - | Fig. S5e | Tukey HSD     | Fig. S5e Legend | 13, 16         | 13 shShank3 vehicle, 16 shShank3 Ro mice                                                       | Fig. S5e Graph | errors bars are mean +/- SEM and scatter plot | Fig. S5e Graph | p = 0.007                                                                                       | Fig. S5e Graph  |                                                                                                            |                 |



|        |          |               |                 |                |                                                                                                |                |                                               |                |                                                                                                 |                                                          |                                                                                                               |                           |
|--------|----------|---------------|-----------------|----------------|------------------------------------------------------------------------------------------------|----------------|-----------------------------------------------|----------------|-------------------------------------------------------------------------------------------------|----------------------------------------------------------|---------------------------------------------------------------------------------------------------------------|---------------------------|
| +<br>- | Fig. S5e | Tukey HSD     | Fig. S5e Legend | 16, 16         | 16 scrShank3 vehicle mice, 16 shShank3 Ro mice                                                 | Fig. S5e Graph | errors bars are mean +/- SEM and scatter plot | Fig. S5e Graph | p = 0.074                                                                                       | Fig. S5e Graph                                           |                                                                                                               |                           |
| +<br>- | Fig. S5f | Two-Way ANOVA | Fig. S5f Legend | 16, 13, 13, 16 | 16 scrShank3 vehicle mice, 13 shShank3 vehicle mice, 13 scrShank3 Ro mice, 16 shShank3 Ro mice | Fig. S5f Graph | errors bars are mean +/- SEM and scatter plot | Fig. S5f Graph | virus x drug interaction p = 0.085<br>virus main effect p = 0.506<br>drug main effect p = 0.406 | exact values not reported since significance not reached | virus x drug interaction F(1,54)= 3.08<br>virus main effect F(1,54)= 0.45<br>drug main effect F(1,54)=0.70    | exact values not reported |
| +<br>- | Fig. S5g | Two-Way ANOVA | Fig. S5g Legend | 16, 13, 13, 16 | 16 scrShank3 vehicle mice, 13 shShank3 vehicle mice, 13 scrShank3 Ro mice, 16 shShank3 Ro mice | Fig. S5g Graph | errors bars are mean +/- SEM and scatter plot | Fig. S5g Graph | virus x drug interaction p = 0.240<br>virus main effect p = 0.215<br>drug main effect p = 0.304 | exact values not reported since significance not reached | virus x drug interaction F(1,54)= 1.41<br>virus main effect F(1,54)= 1.57<br>drug main effect F(1,54)=1.07    | exact values not reported |
| +<br>- | Fig. S5h | Two-Way ANOVA | Fig. S5h Legend | 16, 13, 13, 16 | 16 scrShank3 vehicle mice, 13 shShank3 vehicle mice, 13 scrShank3 Ro mice, 16 shShank3 Ro mice | Fig. S5h Graph | errors bars are mean +/- SEM and scatter plot | Fig. S5h Graph | virus x drug interaction p = 0.031<br>virus main effect p = 0.346<br>drug main effect p = 0.802 | Fig. S5h Legend                                          | virus x drug interaction F(1,54)= 4.88<br>virus main effect F(1,54)= 0.90<br>drug main effect F(1,54)=0.06    | Fig. S5h Legend           |
| +<br>- | Fig. S5h | Tukey HSD     | Fig. S5h Legend | 16, 13         | 16 scrShank3 vehicle mice, 13 shShank3 Vehicle mice                                            | Fig. S5h Graph | errors bars are mean +/- SEM and scatter plot | Fig. S5h Graph | p = 0.084                                                                                       | Fig. S5h Graph                                           |                                                                                                               |                           |
| +<br>- | Fig. S5h | Tukey HSD     | Fig. S5h Legend | 13, 16         | 13 shShank3 vehicle, 16 shShank3 Ro mice                                                       | Fig. S5h Graph | errors bars are mean +/- SEM and scatter plot | Fig. S5h Graph | p = 0.214                                                                                       | Fig. S5h Graph                                           |                                                                                                               |                           |
| +<br>- | Fig. S5h | Tukey HSD     | Fig. S5h Legend | 16, 16         | 16 scrShank3 vehicle mice, 16 shShank3 Ro mice                                                 | Fig. S5h Graph | errors bars are mean +/- SEM and scatter plot | Fig. S5h Graph | p = 0.866                                                                                       | Fig. S5h Graph                                           |                                                                                                               |                           |
| +<br>- | Fig. S5i | Two-Way ANOVA | Fig. S5h Legend | 16, 13, 13, 16 | 16 scrShank3 vehicle mice, 13 shShank3 vehicle mice, 13 scrShank3 Ro mice, 16 shShank3 Ro mice | Fig. S5h Graph | errors bars are mean +/- SEM and scatter plot | Fig. S5h Graph | virus x drug interaction p = 0.122<br>virus main effect p = 0.976<br>drug main effect p = 0.143 | exact values not reported since significance not reached | virus x drug interaction F(1,54)= 2.47<br>virus main effect F(1,54) = 0.001<br>drug main effect F(1,54)= 2.21 | exact values not reported |
| +<br>- | Fig. S5j | Two-Way ANOVA | Fig. S5j Legend | 16, 13, 13, 16 | 16 scrShank3 vehicle mice, 13 shShank3 vehicle mice, 13 scrShank3 Ro mice, 16 shShank3 Ro mice | Fig. S5j Graph | errors bars are mean +/- SEM and scatter plot | Fig. S5j Graph | virus x drug interaction p = 0.122<br>virus main effect p = 0.976<br>drug main effect p = 0.143 | exact values not reported since significance not reached | virus x drug interaction F(1,54)= 2.47<br>virus main effect F(1,54) = 0.001<br>drug main effect F(1,54)= 2.21 | exact values not reported |

|   |          |                                   |                 |                |                                                                                                |                |                                               |                |                                                                                                 |                 |                                                                                                                   |                 |
|---|----------|-----------------------------------|-----------------|----------------|------------------------------------------------------------------------------------------------|----------------|-----------------------------------------------|----------------|-------------------------------------------------------------------------------------------------|-----------------|-------------------------------------------------------------------------------------------------------------------|-----------------|
| + | Fig. S6e | unpaired t-test                   | Fig. S6e Legend | 16, 18         | 16 scrShank3 mice, 18 shShank3 mice                                                            | Fig. S6e Graph | errors bars are mean +/- SEM and scatter plot | Fig. S6e Graph | p = 0.030                                                                                       | Fig. S6e Graph  | t (32) = 2.27                                                                                                     | Fig. S6e Legend |
| + | Fig. S6f | unpaired t-test                   | Fig. S6f Legend | 16, 18         | 16 scrShank3 mice, 18 shShank3 mice                                                            | Fig. S6f Graph | errors bars are mean +/- SEM and scatter plot | Fig. S6f Graph | p = 0.013                                                                                       | Fig. S6f Graph  | t (32) = 2.64                                                                                                     | Fig. S6f Legend |
| + | Fig. S6g | Mann-Whitney                      | Fig. S6g Legend | 16, 18         | 16 scrShank3 mice, 18 shShank3 mice                                                            | Fig. S6g Graph | errors bars are mean +/- SEM and scatter plot | Fig. S6g Graph | p = 0.448                                                                                       | Fig. S6g Graph  | U = 122.00                                                                                                        | Fig. S6g Legend |
| + | Fig. S6i | unpaired t-test                   | Fig. S6i Legend | 16, 18         | 16 scrShank3 mice, 18 shShank3 mice                                                            | Fig. S6i Graph | errors bars are mean +/- SEM and scatter plot | Fig. S6i Graph | p = 0.408                                                                                       | Fig. S6i Graph  | t (32) = 0.84                                                                                                     | Fig. S6i Legend |
| + | Fig. S6j | Mann-Whitney                      | Fig. S6j Legend | 16, 18         | 16 scrShank3 mice, 18 shShank3 mice                                                            | Fig. S6j graph | errors bars are mean +/- SEM and scatter plot | Fig. S6j graph | p = 0.704                                                                                       | Fig. S6j graph  | U = 133.00                                                                                                        | Fig. S6j Legend |
| + | Fig. S6k | Mann-Whitney                      | Fig. S6k Legend | 16, 18         | 16 scrShank3 mice, 18 shShank3 mice                                                            | Fig. S6k graph | errors bars are mean +/- SEM and scatter plot | Fig. S6k graph | p = 0.679                                                                                       | Fig. S6k graph  | U = 132.00                                                                                                        | Fig. S6k Legend |
| + | Fig. S6l | unpaired t-test                   | Fig. S6l        | 12, 11         | 12 scrShank3 mice, 11 shShank3 mice                                                            | Fig. S6l graph | errors bars are mean +/- SEM and scatter plot | Fig. S6l graph | p < 0.001                                                                                       | Fig. S6l graph  | t (21) = 6.83                                                                                                     | Fig. S6l Legend |
| + | Fig. S6m | unpaired t-tests                  | Fig. S6l        | 12, 11         | 12 scrShank3 mice, 11 shShank3 mice                                                            | Fig. S6m Graph | errors bars are mean +/- SEM and scatter plot | Fig. S6m Graph | water p < 0.001<br>sucrose p = 0.182                                                            | Fig. S6m Graph  | water t (21) = 5.26<br>sucrose t (21) = -1.38                                                                     | Fig. S6m Legend |
| + | Fig. S6n | Mann-Whitney                      | Fig. S6n Legend | 12, 11         | 12 scrShank3 mice, 11 shShank3 mice                                                            | Fig. S6n Graph | errors bars are mean +/- SEM and scatter plot | Fig. S6n Graph | p = 0.712                                                                                       | Fig. S6n Graph  | U = 60.00                                                                                                         | Fig. S6n Legend |
| + | Fig. S6o | Mann-Whitney and unpaired t-tests | Fig. S6o Legend | 12, 11         | 12 scrShank3 mice, 11 shShank3 mice                                                            | Fig. S6o Graph | errors bars are mean +/- SEM and scatter plot | Fig. S6o Graph | water p=0.854<br>sucrose p=0.925                                                                | Fig. S6o Graph  | water U = 63.00<br>sucrose t(21) = 0.09                                                                           | Fig. S6o Legend |
| + | Fig. S7a | Mann-Whitney                      | Fig. S7a Legend | 14, 16         | 14 scrShank3 mice, 16 shShank3 mice                                                            | Fig. S7a Graph | errors bars are mean +/- SEM and scatter plot | Fig. S7a Graph | p = 0.135                                                                                       | Fig. S7a Graph  | U = 76.00                                                                                                         | Fig. S7a Legend |
| + | Fig. S7b | Mann-Whitney                      | Fig. S7b Legend | 14, 16         | 14 scrShank3 mice, 16 shShank3 mice                                                            | Fig. S7b Graph | errors bars are mean +/- SEM and scatter plot | Fig. S7b Graph | p = 0.135                                                                                       | Fig. S7b Graph  | U = 76.00                                                                                                         | Fig. S7b Legend |
| + | Fig. S7c | unpaired t-tests                  | Fig. S7c Legend | 14, 16         | 14 scrShank3 mice, 16 shShank3 mice                                                            | Fig. S7c Graph | errors bars are mean +/- SEM and scatter plot | Fig. S7c Graph | wall p = 0.713<br>intermediate p = 0.535<br>center p = 0.704                                    | Fig. S7c Graph  | wall t (28) = 0.37<br>intermediate t(28) = -0.63<br>center t(28) = 0.38                                           | Fig. S7c Legend |
| + | Fig. S7d | Mann-Whitney                      | Fig. S7d Legend | 14, 16         | 14 scrShank3 mice, 16 shShank3 mice                                                            | Fig. S7d Graph | errors bars are mean +/- SEM and scatter plot | Fig. S7d Graph | p = 0.002                                                                                       | Fig. S7d Graph  | U = 38.50                                                                                                         | Fig. S7d Legend |
| + | Fig. S7e | Two-Way ANOVA                     | Fig. S7e Legend | 16, 13, 13, 16 | 16 scrShank3 vehicle mice, 13 shShank3 vehicle mice, 13 scrShank3 Ro mice, 16 shShank3 Ro mice | Fig. S7e Graph | errors bars are mean +/- SEM and scatter plot | Fig. S7e Graph | virus x drug interaction p = 0.044<br>virus main effect p = 0.995<br>drug main effect p = 0.049 | Fig. S7e legend | virus x drug interaction F (1,54) = 4.27<br>virus main effect F (1,54) <0.001<br>drug main effect F (1,54) = 4.05 | Fig. S7e legend |
| + | Fig. S7e | Tukey HSD                         | Fig. S7e Legend | 16, 13         | 16 scrShank3 vehicle mice, 13 shShank3 vehicle mice                                            | Fig. S7e Graph | errors bars are mean +/- SEM and scatter plot | Fig. S7e Graph | p = 0.322                                                                                       | Fig. S7e graph  |                                                                                                                   |                 |

|        |                  |                 |                 |                |                                                                                                |                |                                               |                |                                                                                                 |                 |                                                                                                                   |                 |
|--------|------------------|-----------------|-----------------|----------------|------------------------------------------------------------------------------------------------|----------------|-----------------------------------------------|----------------|-------------------------------------------------------------------------------------------------|-----------------|-------------------------------------------------------------------------------------------------------------------|-----------------|
| +<br>- | Fig. S7e         | Tukey HSD       | Fig. S7e Legend | 13, 16         | 13 shShank3 vehicle mice, 16 shShank3 Ro mice                                                  | Fig. S7e Graph | errors bars are mean +/- SEM and scatter plot | Fig. S7e Graph | p = 0.017                                                                                       | Fig. S7e graph  |                                                                                                                   |                 |
| +<br>- | Fig. S7e         | Tukey HSD       | Fig. S7e Legend | 16, 16         | 16 scrShank3 vehicle mice, 16 shShank3 Ro mice                                                 | Fig. S7e Graph | errors bars are mean +/- SEM and scatter plot | Fig. S7e Graph | p = 0.297                                                                                       | Fig. S7e graph  |                                                                                                                   |                 |
| +<br>- | Fig. S7f         | Two-Way ANOVA   | Fig. S7f Legend | 16, 13, 13, 16 | 16 scrShank3 vehicle mice, 13 shShank3 vehicle mice, 13 scrShank3 Ro mice, 16 shShank3 Ro mice | Fig. S7f Graph | errors bars are mean +/- SEM and scatter plot | Fig. S7f Graph | virus x drug interaction p = 0.045<br>virus main effect p = 0.971<br>drug main effect p = 0.061 | Fig. S7f legend | virus x drug interaction F (1,54) = 4.20<br>virus main effect F (1,54) <0.001<br>drug main effect F (1,54) = 3.65 | Fig. S7f legend |
| +<br>- | Fig. S7f         | Tukey HSD       | Fig. S7f Legend | 16, 13         | 16 scrShank3 vehicle mice, 13 shShank3 vehicle mice                                            | Fig. S7f Graph | errors bars are mean +/- SEM and scatter plot | Fig. S7f Graph | p = 0.342                                                                                       | Fig. S7f Graph  |                                                                                                                   |                 |
| +<br>- | Fig. S7f         | Tukey HSD       | Fig. S7f Legend | 13, 16         | 13 shShank3 vehicle mice, 16 shShank3 Ro mice                                                  | Fig. S7f Graph | errors bars are mean +/- SEM and scatter plot | Fig. S7f Graph | p = 0.021                                                                                       | Fig. S7f Graph  |                                                                                                                   |                 |
| +<br>- | Fig. S7f         | Tukey HSD       | Fig. S7f Legend | 16, 16         | 16 scrShank3 vehicle mice, 16 shShank3 Ro mice                                                 | Fig. S7f Graph | errors bars are mean +/- SEM and scatter plot | Fig. S7f Graph | p = 0.327                                                                                       | Fig. S7f Graph  |                                                                                                                   |                 |
| +<br>- | Fig. S8a left    | unpaired t-test | Fig. S8a Legend | 10, 14         | 10 shShank3 vehicle, 14 shShank3 Ro                                                            | Fig. S8a Graph | errors bars are mean +/- SEM and scatter plot | Fig. S8a Graph | p = 0.832                                                                                       | Fig. S8a Graph  | t (22) = 0.21                                                                                                     | Fig. S8a Legend |
| +<br>- | Fig. S8a middle  | unpaired t-test | Fig. S8a Legend | 10, 14         | 10 shShank3 vehicle, 14 shShank3 Ro                                                            | Fig. S8a Graph | errors bars are mean +/- SEM and scatter plot | Fig. S8a Graph | p = 0.208                                                                                       | Fig. S8a Graph  | t (22) = -1.30                                                                                                    | Fig. S8a Legend |
| +<br>- | Fig. S8a right   | unpaired t-test | Fig. S8a Legend | 10, 14         | 10 shShank3 vehicle, 14 shShank3 Ro                                                            | Fig. S8a Graph | errors bars are mean +/- SEM and scatter plot | Fig. S8a Graph | p = 0.227                                                                                       | Fig. S8a Graph  | t (22) = -1.24                                                                                                    | Fig. S8a Legend |
| +<br>- | Fig. S8b left    | unpaired t-test | Fig. S8b Legend | 10, 14         | 10 shShank3 vehicle, 14 shShank3 Ro                                                            | Fig. S8b Graph | errors bars are mean +/- SEM and scatter plot | Fig. S8b Graph | p = 0.280                                                                                       | Fig. S8b Graph  | t (22) = 1.11                                                                                                     | Fig. S8b Legend |
| +<br>- | Fig. S8b, middle | unpaired t-test | Fig. S8b Legend | 10, 14         | 10 shShank3 vehicle, 14 shShank3 Ro                                                            | Fig. S8b Graph | errors bars are mean +/- SEM and scatter plot | Fig. S8b Graph | p = 0.958                                                                                       | Fig. S8b Graph  | t (22) = -0.05                                                                                                    | Fig. S8b legend |
| +<br>- | Fig. S8b, right  | unpaired t-test | Fig. S8b Legend | 10, 14         | 10 shShank3 vehicle, 14 shShank3 Ro                                                            | Fig. S8b Graph | errors bars are mean +/- SEM and scatter plot | Fig. S8b Graph | p = 0.498                                                                                       | Fig. S8b Graph  | t (22) = 0.69                                                                                                     | Fig. S8b legend |

## ► Representative figures

1. Are any representative images shown (including Western blots and immunohistochemistry/staining) in the paper?

If so, what figure(s)?

Yes, Fig.1, Fig.8, S1, S4, S6

2. For each representative image, is there a clear statement of how many times this experiment was successfully repeated and a discussion of any limitations in repeatability?

If so, where is this reported (section, paragraph #)?

No, but the infection site has been validated for each animal used for the behavioral test and the in vivo electrophysiology. The WB image is from 4 mice. See table above for details.

## ► Statistics and general methods

1. Is there a justification of the sample size?  
If so, how was it justified?  
Where (section, paragraph #)?  
Even if no sample size calculation was performed, authors should report why the sample size is adequate to measure their effect size.
 

Based on previous experiments and publications, we have used a sample size that allow acceptable variability in order to draw valid conclusion.
  
2. Are statistical tests justified as appropriate for every figure?  
Where (section, paragraph #)?
  - a. If there is a section summarizing the statistical methods in the methods, is the statistical test for each experiment clearly defined?  

Yes, in Materials and Methods section there is a paragraph entitled Statistical Analysis where we justified each test for each experiment. For each experiment the statistical test is detailed in the corresponding figure legend.
  
  - b. Do the data meet the assumptions of the specific statistical test you chose (e.g. normality for a parametric test)?  
Where is this described (section, paragraph #)?  

Yes, as reported in the Statistical Analysis paragraph of Materials and Methods we report that the Shapiro-Wilk test was used to assess the normality for all the data. If violated, non-parametric tests were used.
  
  - c. Is there any estimate of variance within each group of data?  
Is the variance similar between groups that are being statistically compared?  
Where is this described (section, paragraph #)?  

For each experiment the equality of variances has been assessed with Levene's test and when violated, the corrected degree of freedom for the t-test has been reported. As described in the Statistical Analysis session.
  
  - d. Are tests specified as one- or two-sided?  

Yes, two-sided tests were used for all the experiments.
  
  - e. Are there adjustments for multiple comparisons?  

Yes, following Two-Way ANOVA post hoc tests that correct for multiple comparisons were used.
  
3. Are criteria for excluding data points reported?  
Was this criterion established prior to data collection?  
Where is this described (section, paragraph #)?  

Yes, the criteria were established prior to data collection and reported in the Material and Methods section.
  
4. Define the method of randomization used to assign subjects (or samples) to the experimental groups and to collect and process data.  
If no randomization was used, state so.  
Where does this appear (section, paragraph #)?  

The day of the viral infection, we randomly assigned within the same litter the mice to their experimental group. This information appears in the text in the Material and methods session.
  
5. Is a statement of the extent to which investigator knew the group allocation during the experiment and in assessing outcome included?  
If no blinding was done, state so.  
Where (section, paragraph #)?  

The behavioral experiments were performed, assessed and analyzed by an experimenter that was blind to the treatments and conditions. For the physiology either the viral infection or the treatment was blind to the experimenter. This information appears in the text in the Materials and methods session.

6. For experiments in live vertebrates, is a statement of compliance with ethical guidelines/regulations included?  
Where (section, paragraph #)?
- Yes it is state in the Material and Methods session, first paragrapher "Animals"
7. Is the species of the animals used reported?  
Where (section, paragraph #)?
- Yes it is state in the Material and Methods section, first paragrapher "Animals"
8. Is the strain of the animals (including background strains of KO/transgenic animals used) reported?  
Where (section, paragraph #)?
- Yes it is state in the Material and Methods section, first paragrapher "Animals"
9. Is the sex of the animals/subjects used reported?  
Where (section, paragraph #)?
- We balanced female and male in this study according to the experimental groups and we now report it in the Materials and Methods section.
10. Is the age of the animals/subjects reported?  
Where (section, paragraph #)?
- Yes we report the age of the animals in the figures when we indicate the experimental protocol, above the graphs and it is also stated in the result session
11. For animals housed in a vivarium, is the light/dark cycle reported?  
Where (section, paragraph #)?
- Yes, we now report a standard light/dark cycle in the Materials and methods session.
12. For animals housed in a vivarium, is the housing group (i.e. number of animals per cage) reported?  
Where (section, paragraph #)?
- We state that the animals were housed in groups in the Materials and Methods session.
13. For behavioral experiments, is the time of day reported (e.g. light or dark cycle)?  
Where (section, paragraph #)?
- We did the experiments during the light cycle. We now report it into the Materials and methods session.
14. Is the previous history of the animals/subjects (e.g. prior drug administration, surgery, behavioral testing) reported?  
Where (section, paragraph #)?
- The history of the animals is reported in result, material and methods and legend sessions.
- a. If multiple behavioral tests were conducted in the same group of animals, is this reported?  
Where (section, paragraph #)?
- No
15. If any animals/subjects were excluded from analysis, is this reported?  
Where (section, paragraph #)?
- Yes, is reported in the material and methods session.
- a. How were the criteria for exclusion defined?  
Where is this described (section, paragraph #)?
- The animals were excluded if no virus infection was detected at the end of the experiment. In the behavioral experiments we excluded one animal that did not show any social preference during the test. This is stated in the Material and Methods session.

- b. Specify reasons for any discrepancy between the number of animals at the beginning and end of the study.

NA

Where is this described (section, paragraph #)?

## ► Reagents

1. Have antibodies been validated for use in the system under study (assay and species)?

Yes, the antibodies used in the study were validated in IHC and WB experiments in mouse and rat.

- a. Is antibody catalog number given?

Yes, in the Materials and Methods session.

Where does this appear (section, paragraph #)?

- b. Where were the validation data reported (citation, supplementary information, Antibodypedia)?

The validation data is reported in the data sheet of the company.

Where does this appear (section, paragraph #)?

2. Cell line identity

- a. Are any cell lines used in this paper listed in the database of commonly misidentified cell lines maintained by [ICLAC](#) and [NCBI Biosample](#)?

NA

Where (section, paragraph #)?

- b. If yes, include in the Methods section a scientific justification of their use--indicate here in which section and paragraph the justification can be found.

NA

- c. For each cell line, include in the Methods section a statement that specifies:

- the source of the cell lines
- have the cell lines been authenticated? If so, by which method?
- have the cell lines been tested for mycoplasma contamination?

NA

Where (section, paragraph #)?

## ▶ Data deposition

Data deposition in a public repository is mandatory for:

- Protein, DNA and RNA sequences
- Macromolecular structures
- Crystallographic data for small molecules
- Microarray data

Deposition is strongly recommended for many other datasets for which structured public repositories exist; more details on our data policy are available [here](#). We encourage the provision of other source data in supplementary information or in unstructured repositories such as [Figshare](#) and [Dryad](#).

We encourage publication of Data Descriptors (see [Scientific Data](#)) to maximize data reuse.

- Are accession codes for deposit dates provided?

Where (section, paragraph #)?

Yes, we reported the GeneBank code in the accession code session.

## ▶ Computer code/software

Any custom algorithm/software that is central to the methods must be supplied by the authors in a usable and readable form for readers at the time of publication. However, referees may ask for this information at any time during the review process.

- Identify all custom software or scripts that were required to conduct the study and where in the procedures each was used.

NA

- If computer code was used to generate results that are central to the paper's conclusions, include a statement in the Methods section under "**Code availability**" to indicate whether and how the code can be accessed. Include version information as necessary and any restrictions on availability.

NA

## ▶ Human subjects

- Which IRB approved the protocol?

Where is this stated (section, paragraph #)?

NA

- Is demographic information on all subjects provided?

Where (section, paragraph #)?

NA

- Is the number of human subjects, their age and sex clearly defined?

Where (section, paragraph #)?

NA

- Are the inclusion and exclusion criteria (if any) clearly specified?

Where (section, paragraph #)?

NA

5. How well were the groups matched?   
Where is this information described (section, paragraph #)?
6. Is a statement included confirming that informed consent was obtained from all subjects?   
Where (section, paragraph #)?
7. For publication of patient photos, is a statement included confirming that consent to publish was obtained?   
Where (section, paragraph #)?

## ► fMRI studies

For papers reporting functional imaging (fMRI) results please ensure that these minimal reporting guidelines are met and that all this information is clearly provided in the methods:

1. Were any subjects scanned but then rejected for the analysis after the data was collected?   
a. If yes, is the number rejected and reasons for rejection described?   
Where (section, paragraph #)?
2. Is the number of blocks, trials or experimental units per session and/or subjects specified?   
Where (section, paragraph #)?
3. Is the length of each trial and interval between trials specified?
4. Is a blocked, event-related, or mixed design being used? If applicable, please specify the block length or how the event-related or mixed design was optimized.
5. Is the task design clearly described?   
Where (section, paragraph #)?
6. How was behavioral performance measured?
7. Is an ANOVA or factorial design being used?
8. For data acquisition, is a whole brain scan used?   
If not, state area of acquisition.  
a. How was this region determined?



9. Is the field strength (in Tesla) of the MRI system stated?
- a. Is the pulse sequence type (gradient/spin echo, EPI/spiral) stated?
- b. Are the field-of-view, matrix size, slice thickness, and TE/TR/flip angle clearly stated?
10. Are the software and specific parameters (model/functions, smoothing kernel size if applicable, etc.) used for data processing and pre-processing clearly stated?
11. Is the coordinate space for the anatomical/functional imaging data clearly defined as subject/native space or standardized stereotaxic space, e.g., original Talairach, MNI305, ICBM152, etc? Where (section, paragraph #)?
12. If there was data normalization/standardization to a specific space template, are the type of transformation (linear vs. nonlinear) used and image types being transformed clearly described? Where (section, paragraph #)?
13. How were anatomical locations determined, e.g., via an automated labeling algorithm (AAL), standardized coordinate database (Talairach daemon), probabilistic atlases, etc.?
14. Were any additional regressors (behavioral covariates, motion etc) used?
15. Is the contrast construction clearly defined?
16. Is a mixed/random effects or fixed inference used?
- a. If fixed effects inference used, is this justified?
17. Were repeated measures used (multiple measurements per subject)?
- a. If so, are the method to account for within subject correlation and the assumptions made about variance clearly stated?
18. If the threshold used for inference and visualization in figures varies, is this clearly stated?
19. Are statistical inferences corrected for multiple comparisons?
- a. If not, is this labeled as uncorrected?

20. Are the results based on an ROI (region of interest) analysis?

NA

a. If so, is the rationale clearly described?

NA

b. How were the ROI's defined (functional vs anatomical localization)?

NA

21. Is there correction for multiple comparisons within each voxel?

NA

22. For cluster-wise significance, is the cluster-defining threshold and the corrected significance level defined?

NA

## ► Additional comments

---

Additional Comments

NA
